# Supplementary material for: A global algorithm for identifying changing streamflow regimes: application to Canadian natural streams (1966–2010)
Source: Copernicus journal article supplement (doi:10.5194/hess-25-5193-2021), 2021-09-24
Supplement: Supplementary file 1 [file hess-25-5193-2021-supplement.pdf]

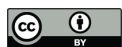

*Supplement of*

**A global algorithm for identifying changing streamflow regimes: application to Canadian natural streams (1966–2010)**

**Masoud Zaerpour et al.**

*Correspondence to:* Masoud Zaerpour ([masoud.zaerpour@concordia.ca](mailto:masoud.zaerpour@concordia.ca)) and Ali Nazemi ([ali.nazemi@concordia.ca](mailto:ali.nazemi@concordia.ca))

The copyright of individual parts of the supplement might differ from the article licence.

## Supplement

### Supplement A. The detailed description of selected RHBN stations used in this study

**Table S1.** Summary information for the selected RHBN stations in the Pacific Basin.

| RHBN ID | Station ID | Station Name                                              | Province | Lat. | Long.  | Basin area (km <sup>2</sup> ) | Sub-basin | Basin         |
|---------|------------|-----------------------------------------------------------|----------|------|--------|-------------------------------|-----------|---------------|
| 09BC001 | S72        | Pelly River at Pelly Crossing                             | YT       | 62.8 | -136.6 | 48900                         | Yukon     | Pacific Ocean |
| 09AC001 | S74        | Takhini River Near Whitehorse                             | YT       | 60.9 | -135.7 | 7050                          | Yukon     | Pacific Ocean |
| 09AE003 | S77        | Swift River Near Swift River                              | BC       | 59.9 | -131.8 | 3390                          | Yukon     | Pacific Ocean |
| 09AA006 | S75        | Atlin River Near Atlin                                    | BC       | 59.6 | -133.8 | 6860                          | Yukon     | Pacific Ocean |
| 08CD001 | S71        | Tuya River Near Telegraph Creek                           | BC       | 58.1 | -130.8 | 3550                          | Seaboard  | Pacific Ocean |
| 08CG001 | S82        | Iskut River Below Johnson River                           | BC       | 56.7 | -131.7 | 9500                          | Seaboard  | Pacific Ocean |
| 08FB006 | S87        | Atnarko River Near The Mouth                              | BC       | 52.4 | -126.0 | 2550                          | Seaboard  | Pacific Ocean |
| 08OA002 | S78        | Yakoun River Near Port Clements                           | BC       | 53.6 | -132.2 | 480                           | Seaboard  | Pacific Ocean |
| 08HB008 | S83        | Sproat River Near Alberni                                 | BC       | 49.3 | -124.9 | 351                           | Seaboard  | Pacific Ocean |
| 08GA010 | S84        | Capilano River Above Intake                               | BC       | 49.4 | -123.1 | 173                           | Seaboard  | Pacific Ocean |
| 08HA001 | S81        | Chemainus River Near Westholme                            | BC       | 48.9 | -123.7 | 355                           | Seaboard  | Pacific Ocean |
| 08HA003 | S79        | Koksilah River at Cowichan Station                        | BC       | 48.7 | -123.7 | 209                           | Seaboard  | Pacific Ocean |
| 08JE001 | S95        | Stuart River Near Fort St. James                          | BC       | 54.4 | -124.3 | 14200                         | Fraser    | Pacific Ocean |
| 08JB002 | S96        | Stellako River At Glenannan                               | BC       | 54.0 | -125.0 | 3600                          | Fraser    | Pacific Ocean |
| 08LA001 | S89        | Clearwater River Near Clearwater Station                  | BC       | 51.6 | -120.1 | 10300                         | Fraser    | Pacific Ocean |
| 08LD001 | S88        | Adams River Near Squilax                                  | BC       | 50.9 | -119.7 | 3210                          | Fraser    | Pacific Ocean |
| 08MA002 | S102       | Chilko River At Outlet Of Chilko Lake                     | BC       | 51.6 | -124.1 | 2130                          | Fraser    | Pacific Ocean |
| 08MG005 | S85        | Lillooet River Near Pemberton                             | BC       | 50.3 | -122.8 | 2100                          | Fraser    | Pacific Ocean |
| 08MH006 | S80        | North Alouette River 232 <sup>nd</sup> Street Maple Ridge | BC       | 49.2 | -122.6 | 37.3                          | Fraser    | Pacific Ocean |
| 08MH016 | S86        | Chilliwack River At Outlet Of Chilliwack Lake             | BC       | 49.1 | -121.5 | 335                           | Fraser    | Pacific Ocean |
| 08NB005 | S99        | Columbia River At Donald                                  | BC       | 51.5 | -117.2 | 9700                          | Columbia  | Pacific Ocean |
| 08NF001 | S101       | Kootenay River At Kootenay Crossing                       | BC       | 50.9 | -116.0 | 416                           | Columbia  | Pacific Ocean |
| 08ND013 | S90        | Illecillewaet River At Greeley                            | BC       | 51.0 | -118.1 | 1150                          | Columbia  | Pacific Ocean |
| 08NE006 | S93        | Kuskanax Creek Near Nakusp                                | BC       | 50.3 | -117.7 | 330                           | Columbia  | Pacific Ocean |
| 08NE077 | S91        | Barnes Creek Near Needles                                 | BC       | 49.9 | -118.1 | 204                           | Columbia  | Pacific Ocean |
| 08NH005 | S94        | Kaslo River Below Kemp Creek                              | BC       | 49.9 | -117.0 | 442                           | Columbia  | Pacific Ocean |
| 08NH084 | S98        | Arrow Creek Near Erickson                                 | BC       | 49.2 | -116.5 | 78.3                          | Columbia  | Pacific Ocean |
| 08NJ130 | S97        | Anderson Creek Near Nelson                                | BC       | 49.5 | -117.3 | 9.07                          | Columbia  | Pacific Ocean |
| 08NN015 | S100       | West Kettle River Near Mcculloch                          | BC       | 49.7 | -119.1 | 233                           | Columbia  | Pacific Ocean |
| 08NL007 | S92        | Similkameen River At Princeton                            | BC       | 49.5 | -120.5 | 1810                          | Columbia  | Pacific Ocean |

5

10

15

20

**Table S2.** Summary information for the selected RHBN stations in the Atlantic Basin.

| RHBN ID | Station ID | Station Name                                              | Province | Lat. | Long  | Basin area (km <sup>2</sup> ) | Sub-basin             | Basin          |
|---------|------------|-----------------------------------------------------------|----------|------|-------|-------------------------------|-----------------------|----------------|
| 02YC001 | S11        | Torrent River At Bristols Pool                            | NL       | 50.6 | -57.2 | 624                           | Seaboard              | Atlantic Ocean |
| 02YL001 | S13        | Upper Humber River Near Reidville                         | NL       | 49.2 | -57.4 | 2110                          | Seaboard              | Atlantic Ocean |
| 02YQ001 | S17        | Gander River At Big Chute                                 | NL       | 49.0 | -54.9 | 4450                          | Seaboard              | Atlantic Ocean |
| 02YR001 | S15        | Middle Brook Near Gambo                                   | NL       | 48.8 | -54.2 | 275                           | Seaboard              | Atlantic Ocean |
| 02ZB001 | S14        | Isle Aux Morts River Below Highway Bridge                 | NL       | 47.6 | -59.0 | 205                           | Seaboard              | Atlantic Ocean |
| 02ZF001 | S8         | Bay Du Nord River At Big Falls                            | NL       | 47.7 | -55.4 | 1170                          | Seaboard              | Atlantic Ocean |
| 02ZG001 | S10        | Garnish River Near Garnish                                | NL       | 47.2 | -55.3 | 205                           | Seaboard              | Atlantic Ocean |
| 02ZH001 | S18        | Pipers Hole River At Mothers Brook                        | NL       | 47.9 | -54.3 | 764                           | Seaboard              | Atlantic Ocean |
| 02ZK001 | S9         | Rocky River Near Colinet                                  | NL       | 47.2 | -53.6 | 301                           | Seaboard              | Atlantic Ocean |
| 02ZM006 | S20        | Northeast Pond River At Northeast Pond                    | NL       | 47.6 | -52.8 | 3.63                          | Seaboard              | Atlantic Ocean |
| 01FB001 | S53        | Northeast Margaree River At Margaree Valley               | NS       | 46.4 | -61.0 | 368                           | Seaboard              | Atlantic Ocean |
| 01FB003 | S50        | Southwest Margaree River Near Upper Margaree              | NS       | 46.2 | -61.1 | 357                           | Seaboard              | Atlantic Ocean |
| 01FA001 | S33        | River Inhabitants At Glenora                              | NS       | 45.7 | -61.3 | 193                           | Seaboard              | Atlantic Ocean |
| 01EO001 | S45        | St. Marys River At Stillwater                             | NS       | 45.2 | -62.0 | 1350                          | Seaboard              | Atlantic Ocean |
| 01DP004 | S52        | Middle River Of Pictou At Rocklin                         | NS       | 45.5 | -62.8 | 92.2                          | Seaboard              | Atlantic Ocean |
| 01DG003 | S51        | Beaverbank River Near Kinsac                              | NS       | 44.9 | -63.7 | 96.9                          | Seaboard              | Atlantic Ocean |
| 01EF001 | S47        | Lahave River At West Northfield                           | NS       | 44.4 | -64.6 | 1250                          | Seaboard              | Atlantic Ocean |
| 01EC001 | S49        | Roseway River At Lower Ohio                               | NS       | 43.8 | -65.4 | 495                           | Seaboard              | Atlantic Ocean |
| 01BV006 | S44        | Point Wolfe River At Fundy National Park                  | NB       | 45.6 | -65.0 | 130                           | Seaboard              | Atlantic Ocean |
| 01BU002 | S46        | Petitcodiac River Near Petitcodiac                        | NB       | 45.9 | -65.2 | 391                           | Seaboard              | Atlantic Ocean |
| 01BS001 | S40        | Coal Branch River At Beersville                           | NB       | 46.4 | -65.1 | 166                           | Seaboard              | Atlantic Ocean |
| 01CA003 | S35        | Carruthers Brook Near St. Anthony                         | PE       | 46.7 | -64.2 | 46.8                          | Seaboard              | Atlantic Ocean |
| 01BO001 | S38        | Southwest Miramichi River At Blackville                   | NB       | 46.7 | -65.8 | 5050                          | Seaboard              | Atlantic Ocean |
| 01BP001 | S37        | Little Southwest Miramichi River At Lyttleton             | NB       | 46.9 | -65.9 | 1340                          | Seaboard              | Atlantic Ocean |
| 01BQ001 | S43        | Northwest Miramichi River At Trout Brook                  | NB       | 47.1 | -65.8 | 948                           | Seaboard              | Atlantic Ocean |
| 01BC001 | S55        | Restigouche River Below Kedgwick River                    | NB       | 47.7 | -67.5 | 3160                          | Seaboard              | Atlantic Ocean |
| 01BE001 | S48        | Upsalquitch River At Upsalquitch                          | NB       | 47.8 | -66.9 | 2270                          | Seaboard              | Atlantic Ocean |
| 01BJ003 | S36        | Jacquet River Near Durham Centre                          | NB       | 47.9 | -66.0 | 510                           | Seaboard              | Atlantic Ocean |
| 02VC001 | S12        | Romaine (Riviere) Au Pont De La Q.I.T.                    | QC       | 50.3 | -63.6 | 13000                         | St. Lawrence          | Atlantic Ocean |
| 02UC002 | S16        | Moisie (Riviere) A 51 Km En Amont Du Pont Du Q.N.S.L.R.   | QC       | 50.4 | -66.2 | 19000                         | St. Lawrence          | Atlantic Ocean |
| 02RF001 | S19        | Chamouchouane (Riviere) A La Tete De La Chute Aux Saumons | QC       | 48.7 | -72.5 | 15300                         | St. Lawrence          | Atlantic Ocean |
| 02QA002 | S39        | Rimouski (Riviere) A 3 7 Km En Amont Du Pont-Route 132    | QC       | 48.4 | -68.6 | 1610                          | St. Lawrence          | Atlantic Ocean |
| 02PB006 | S25        | Sainte-Anne (Riviere) (Bras Du Nord De La) En Amont       | QC       | 47.0 | -71.9 | 642                           | St. Lawrence          | Atlantic Ocean |
| 02OE027 | S57        | Eaton (Riviere) PresDeLaRiviere Saint-Francois-3          | QC       | 45.5 | -71.7 | 642                           | St. Lawrence          | Atlantic Ocean |
| 02NF003 | S32        | Matawin (Riviere) A Saint-Michel-Des-Saints               | QC       | 46.7 | -73.9 | 1390                          | St. Lawrence          | Atlantic Ocean |
| 02LB007 | S58        | South Nation River At Spencerville                        | ON       | 44.8 | -75.5 | 246                           | St. Lawrence          | Atlantic Ocean |
| 02KB001 | S21        | Petawawa River Near Petawawa                              | ON       | 45.9 | -77.3 | 4122.32                       | St. Lawrence          | Atlantic Ocean |
| 02HL004 | S22        | Skootamatta River Near Actinolite                         | ON       | 44.5 | -77.3 | 677.65                        | St. Lawrence          | Atlantic Ocean |
| 02EA005 | S29        | North Magnetawan River Near Burks Falls                   | ON       | 45.7 | -79.4 | 328.84                        | St. Lawrence          | Atlantic Ocean |
| 02EC002 | S60        | Black River Near Washago                                  | ON       | 44.7 | -79.3 | 1510.27                       | St. Lawrence          | Atlantic Ocean |
| 02FB007 | S62        | Sydenham River Near Owen Sound                            | ON       | 44.5 | -80.9 | 182.97                        | St. Lawrence          | Atlantic Ocean |
| 02FC001 | S59        | Saugeen River Near Port Elgin                             | ON       | 44.5 | -81.3 | 3953.52                       | St. Lawrence          | Atlantic Ocean |
| 02GA010 | S61        | Nith River Near Canning                                   | ON       | 43.2 | -80.5 | 1034.28                       | St. Lawrence          | Atlantic Ocean |
| 02AB008 | S24        | Neebing River Near Thunder Bay                            | ON       | 48.4 | -89.3 | 187                           | St. Lawrence          | Atlantic Ocean |
| 01AQ001 | S41        | Lepreau River At Lepre                                    | NB       | 45.2 | -66.5 | 239                           | Saint John- St. Croix | Atlantic Ocean |
| 01AP004 | S34        | Kennebecasis River At Apohaqui                            | NB       | 45.7 | -65.6 | 1100                          | Saint John- St. Croix | Atlantic Ocean |
| 01AP002 | S42        | Canaan River At East Canaan                               | NB       | 46.1 | -65.4 | 668                           | Saint John- St. Croix | Atlantic Ocean |
| 01AK001 | S54        | Shogomoc Stream Near Trans-Canada Highway                 | NB       | 45.9 | -67.3 | 234                           | Saint John- St. Croix | Atlantic Ocean |
| 01AD002 | S56        | Saint John River At Fort Kent                             | NB       | 47.3 | -68.6 | 14700                         | Saint John- St. Croix | Atlantic Ocean |

30 **Table S3.** Summary information for the selected RHBN stations in the Arctic Basin.

| RHBN ID | Station ID | Station Name                               | Province | Lat. | Long.  | Basin area (km <sup>2</sup> ) | Sub-basin       | Basin        |
|---------|------------|--------------------------------------------|----------|------|--------|-------------------------------|-----------------|--------------|
| 10PB001 | S7         | Coppermine River At Outlet Of Point Lake   | NT       | 65.4 | -114.0 | 19200                         | Seaboard        | Arctic Ocean |
| 10RC001 | S1         | Back River Above Hermann River             | NU       | 66.1 | -96.5  | 93900                         | Seaboard        | Arctic Ocean |
| 10CB001 | S68        | Sikanni Chief River Near Fort Nelson       | BC       | 57.2 | -122.7 | 2180                          | Lower Mackenzie | Arctic Ocean |
| 10BE004 | S76        | Toad River Above Nonda Creek               | BC       | 58.9 | -125.4 | 2540                          | Lower Mackenzie | Arctic Ocean |
| 10CD001 | S65        | Muskwa River Near Fort Nelson              | BC       | 58.8 | -122.7 | 20300                         | Lower Mackenzie | Arctic Ocean |
| 07LE002 | S5         | Fond Du Lac River At Outlet Of Black Lake  | SK       | 59.2 | -105.5 | 50700                         | Lower Mackenzie | Arctic Ocean |
| 07OB001 | S3         | Hay River Near Hay River                   | NT       | 60.7 | -115.9 | 51700                         | Lower Mackenzie | Arctic Ocean |
| 10EB001 | S73        | South Nahanni River Above Virginia Falls   | NT       | 61.6 | -125.8 | 14500                         | Lower Mackenzie | Arctic Ocean |
| 07RD001 | S6         | Lockhart River At Outlet Of Artillery Lake | NT       | 62.9 | -108.5 | 26600                         | Lower Mackenzie | Arctic Ocean |
| 07FB001 | S66        | Pine River At East Pine                    | BC       | 55.7 | -121.2 | 12100                         | Peace Athabasca | Arctic Ocean |
| 07CD001 | S64        | Clearwater River At Draper                 | AB       | 56.7 | -111.3 | 30799.4                       | Peace Athabasca | Arctic Ocean |
| 07FC003 | S67        | Blueberry River Below Aitken Creek         | BC       | 56.7 | -121.2 | 1770                          | Peace Athabasca | Arctic Ocean |

**Table S4.** Summary information for the selected RHBN stations in the Hudson Bay Basin.

| RHBN ID | Station ID | Station Name                                                | Province | Lat. | Long.  | Basin area (km <sup>2</sup> ) | Sub-basin                 | Basin      |
|---------|------------|-------------------------------------------------------------|----------|------|--------|-------------------------------|---------------------------|------------|
| 04NA001 | S28        | Harricana (Riviere) 3 1 Km En Aval Du Pont-Route 111 A Amos | QC       | 48.6 | -78.1  | 3680                          | Western & Northern HB     | Hudson Bay |
| 04LJ001 | S27        | Missinaibi River At Mattice                                 | ON       | 49.6 | -83.3  | 8574.38                       | Western & Northern HB     | Hudson Bay |
| 04JC002 | S26        | Nagagami River At Highway No. 11                            | ON       | 49.8 | -84.5  | 2178.36                       | Western & Northern HB     | Hudson Bay |
| 06CD002 | S31        | Churchill River Above Otter Rapids                          | SK       | 55.6 | -104.7 | 119000                        | Northern Quebec & Ontario | Hudson Bay |
| 06GD001 | S4         | Seal River Below Great Island                               | MB       | 58.9 | -96.3  | 48100                         | Northern Quebec & Ontario | Hudson Bay |
| 06LC001 | S2         | Kazan River Above Kazan Falls                               | NU       | 63.7 | -95.9  | 70000                         | Northern Quebec & Ontario | Hudson Bay |
| 05PB014 | S30        | Turtle River Near Mine Centre                               | ON       | 48.9 | -92.7  | 4767.74                       | Nelson                    | Hudson Bay |
| 05TD001 | S23        | Grass River Above Standing Stone Falls                      | MB       | 55.7 | -97.0  | 15400                         | Nelson                    | Hudson Bay |
| 05LH005 | S63        | Waterhen River Near Waterhen                                | MB       | 51.8 | -99.5  | 55100                         | Nelson                    | Hudson Bay |
| 05AD005 | S70        | Belly River Near Mountain View                              | AB       | 49.1 | -113.7 | 319.2                         | Nelson                    | Hudson Bay |
| 05AD003 | S69        | Waterton River Near Waterton Park                           | AB       | 49.1 | -113.8 | 612.7                         | Nelson                    | Hudson Bay |
| 05AA008 | S103       | Crowsnest River At Frank                                    | AB       | 49.6 | -114.4 | 402.7                         | Nelson                    | Hudson Bay |
| 05BB001 | S104       | Bow River At Banff                                          | AB       | 51.2 | -115.6 | 2209.6                        | Nelson                    | Hudson Bay |
| 05DA007 | S105       | Mistaya River Near Saskatchewan Crossing                    | AB       | 51.9 | -116.7 | 248                           | Nelson                    | Hudson Bay |

35

40

45

## Supplement B. The distribution of selected RHBN stations in major Canadian drainage basins and sub-basins

**Table S5.** Main sub-basins of the four Canadian major drainage basins along with their drainage areas, abbreviations and the number of RHBN stations within their territory used in this study.

| Major Basin | Sub-basin                 | Area (1000 km <sup>2</sup> ) | # of stations | Abbreviation |
|-------------|---------------------------|------------------------------|---------------|--------------|
| Pacific     | Yukon                     | 330.4                        | 4             | P1           |
|             | Seaboard                  | 334.2                        | 8             | P2           |
|             | Fraser                    | 232.5                        | 8             | P3           |
|             | Columbia                  | 102.8                        | 10            | P4           |
| Atlantic    | Seaboard                  | 499.7                        | 28            | At1          |
|             | St. Lawrence              | 860.1                        | 16            | At2          |
|             | Saint John- St. Croix     | 41.9                         | 5             | At3          |
| Arctic      | Seaboard                  | 1,739.3                      | 2             | Ar1          |
|             | Lower Mackenzie           | 1,321.1                      | 7             | Ar2          |
|             | Peace Athabasca           | 482.7                        | 3             | Ar3          |
| Hudson Bay  | Western & Northern HB     | 1,243.9                      | 3             | H1           |
|             | Northern Quebec & Ontario | 1,889.2                      | 3             | H2           |
|             | Nelson                    | 1,138.5                      | 8             | H3           |

50

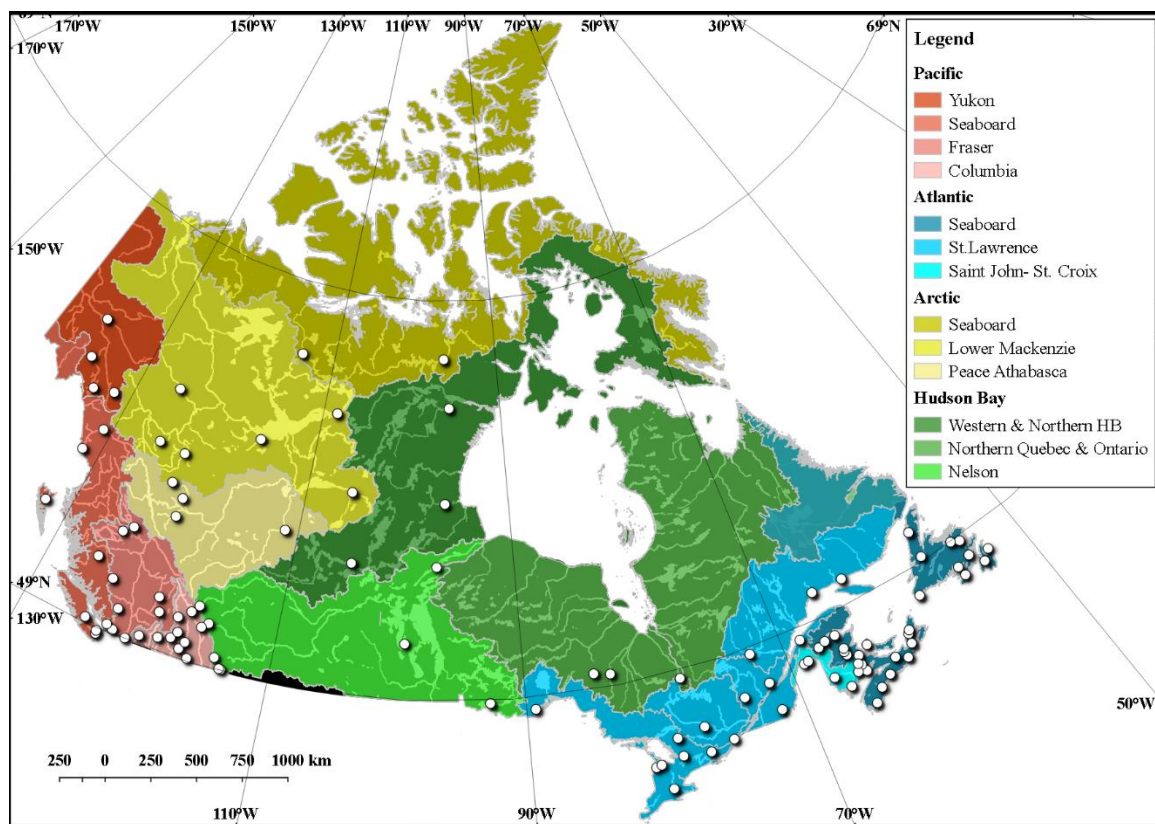

**Figure S1.** The distribution of the selected 105 RHBN streamflow stations across the major Canadian drainage basins and sub-basins.

55

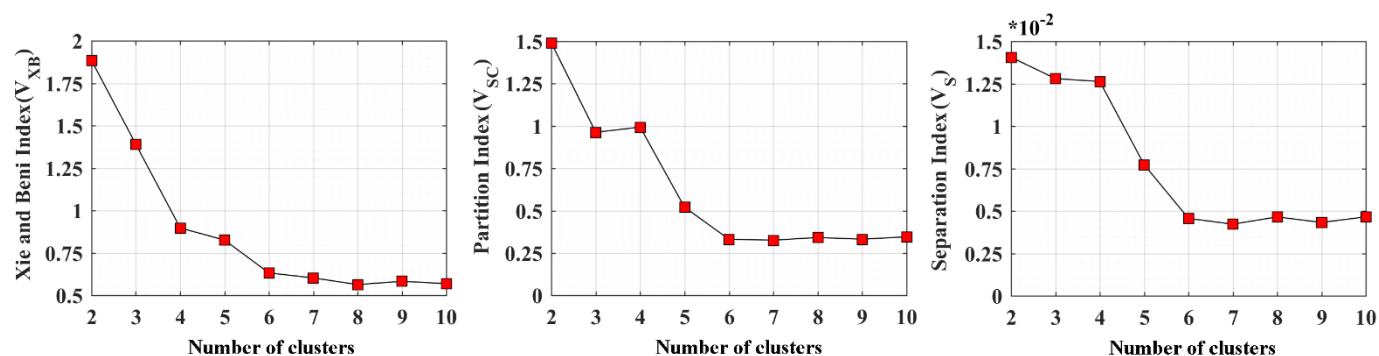

**Figure S2.** Variation in the Xie and Beni, Partition, and Separation indices by altering the numbers of clusters.

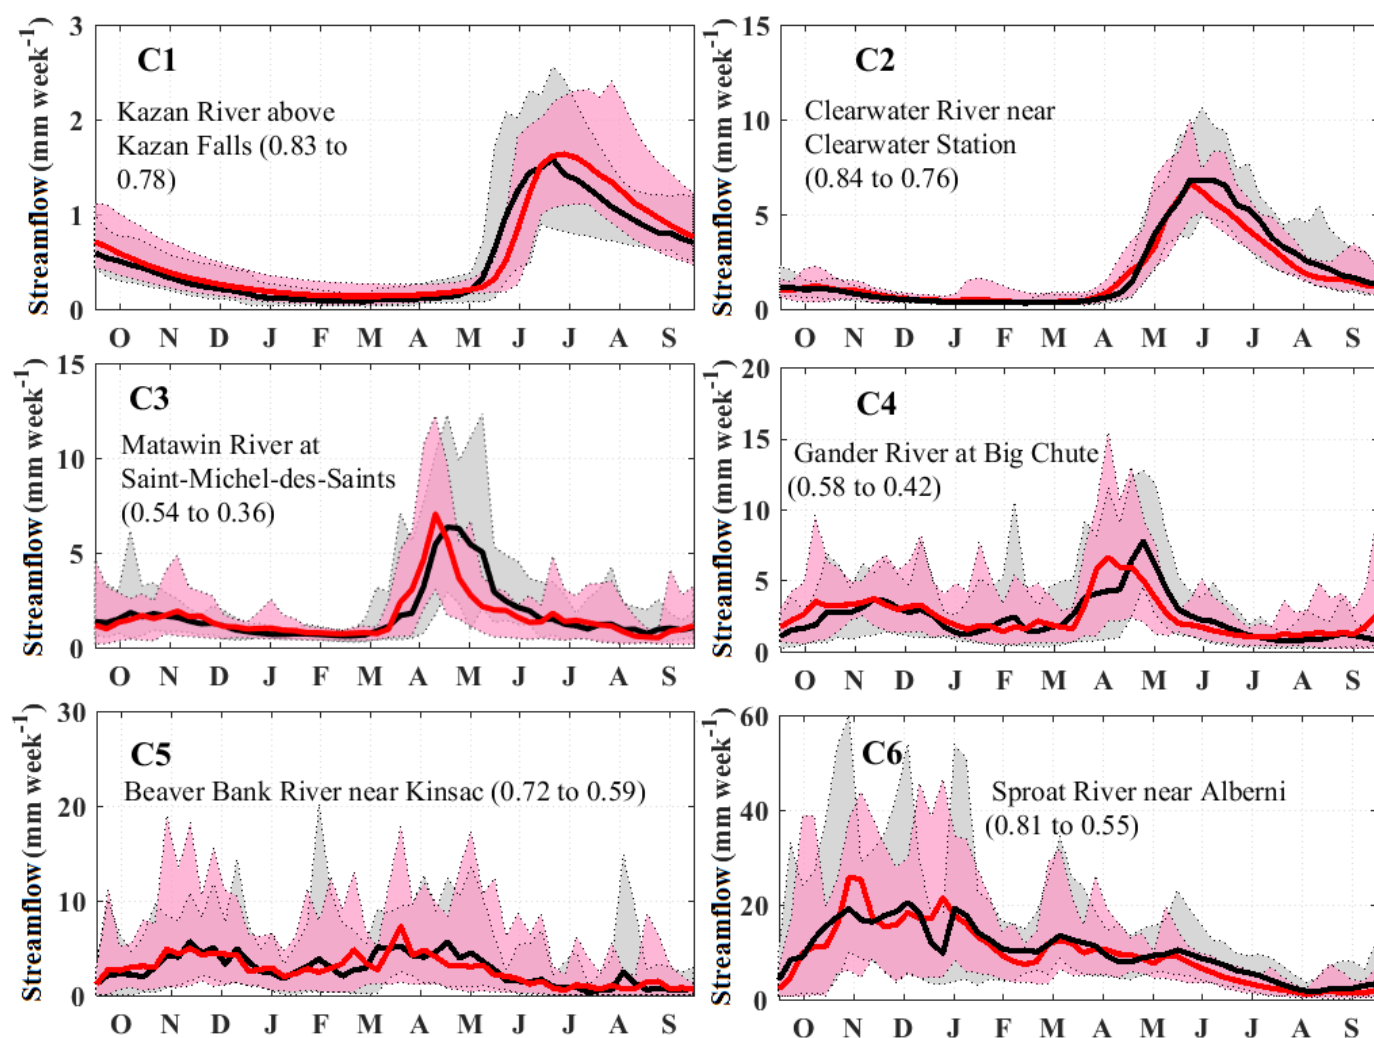

**Figure S3.** Alterations in the decadal streamflow regimes at the archetype streams through time. The envelopes of annual hydrographs for the earliest (1966 to 1975) and the latest (2001 to 2010) decadal episodes in archetype streams are shown with grey and pink colors, respectively. The expected annual hydrographs during the earliest and the latest decadal periods are shown in solid black and solid red lines. The change in the membership degree of each archetype stream is shown within parentheses.

# Supplement D. The detailed analysis of trend and evolution of decadal memberships

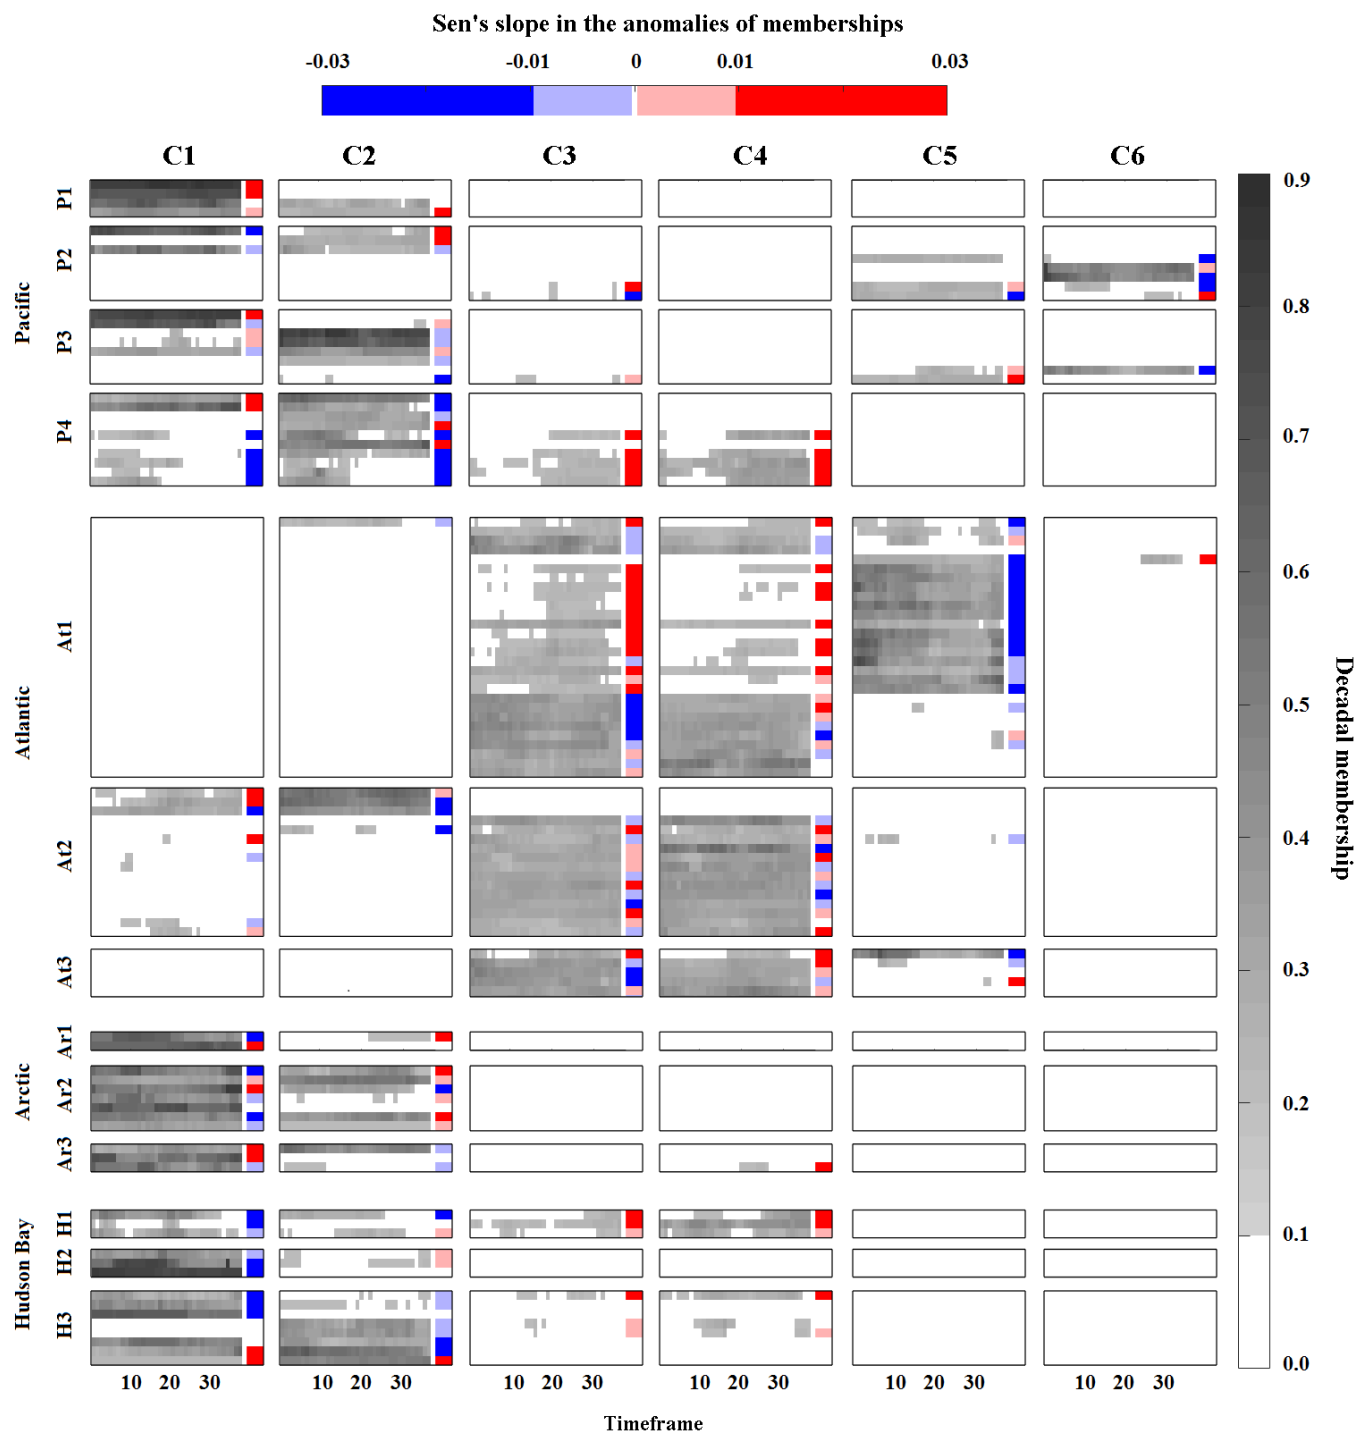

**Figure S4.** Evolutions in the degrees of membership to each regime type in 105 considered RHBN streams grouped in major basins/sub-basins, along with the corresponding Sen's slope. For each stream, the shades of grey show decadal memberships over the period of 1966 to 2010. The color bar shows the direction and significance of the Sen's slope of the trend in the anomalies of memberships. Positive and negative trends are shown with red and blue colors, respectively. Sharper colors show significant cases. In each sub-basin, stations are sorted from north to south from the top to the bottom.

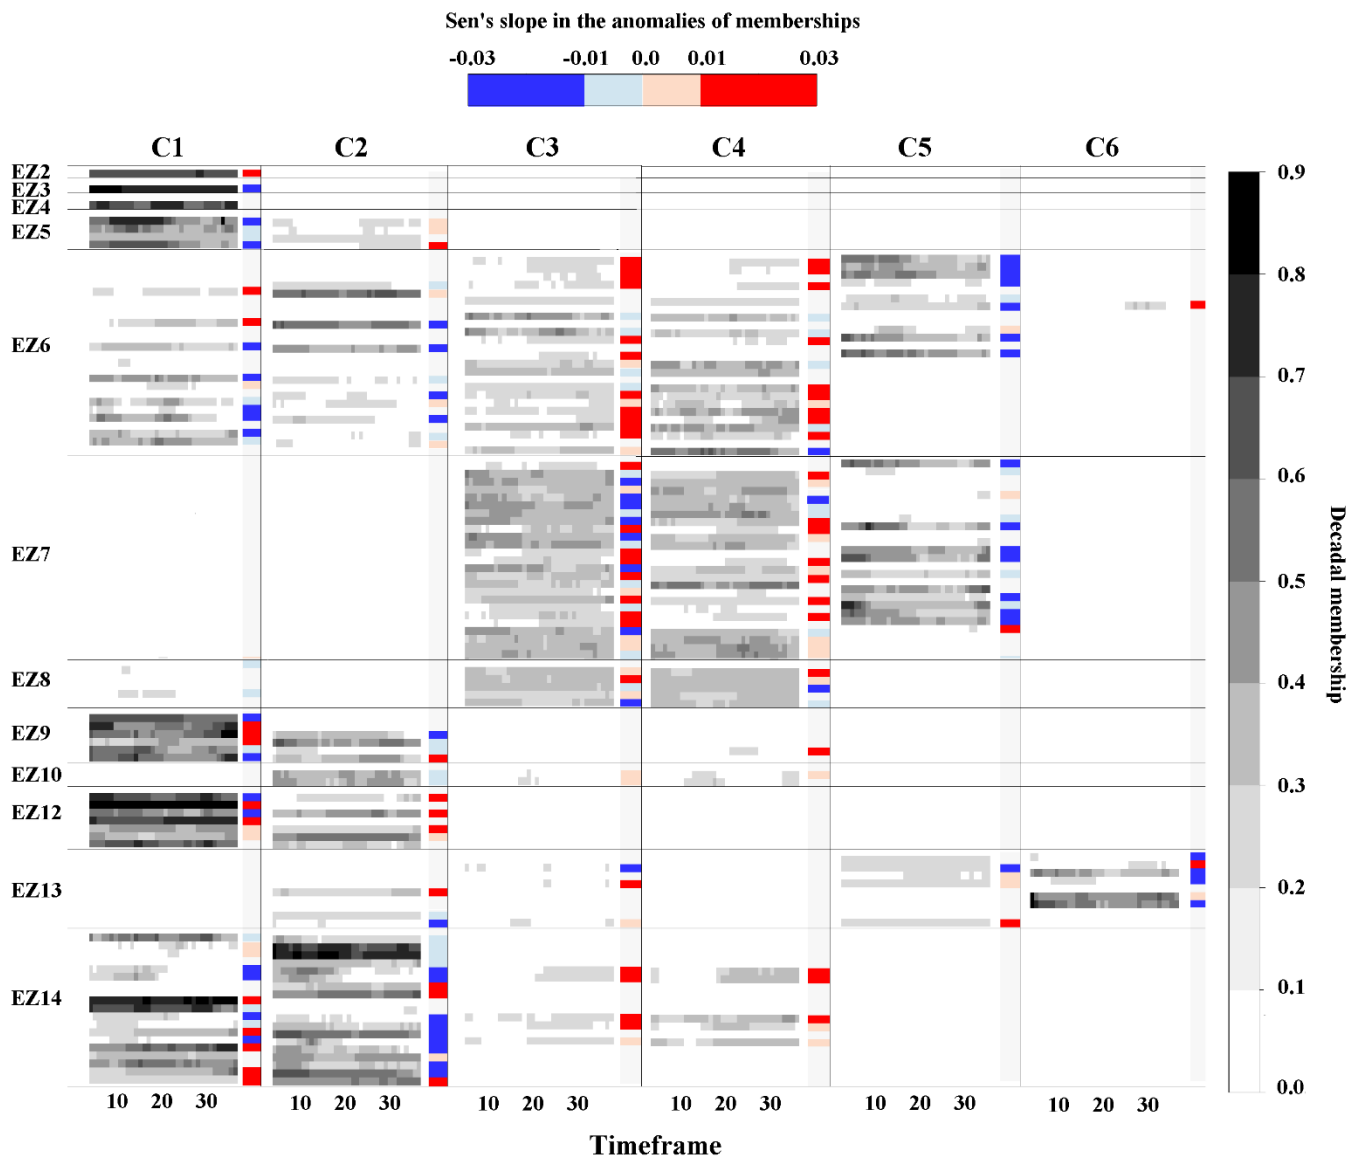

80 **Figure S5.** Evolution in degrees of membership to each regime type in the 105 considered RHBN streams grouped according to ecozones, along  
 85 with the corresponding Sen's slopes. For each stream, shades of grey show decadal memberships over the period of 1966 to 2010. The color bar  
 shows the direction and significance of the Sen's slope of the trend in the anomalies of memberships. Positive and negative trends are shown  
 with red and blue colors, respectively. Sharper colors show significant trends. The RHBN stations at each ecozone are sorted from the lowest to  
 the highest elevations from the top to the bottom.

85

90



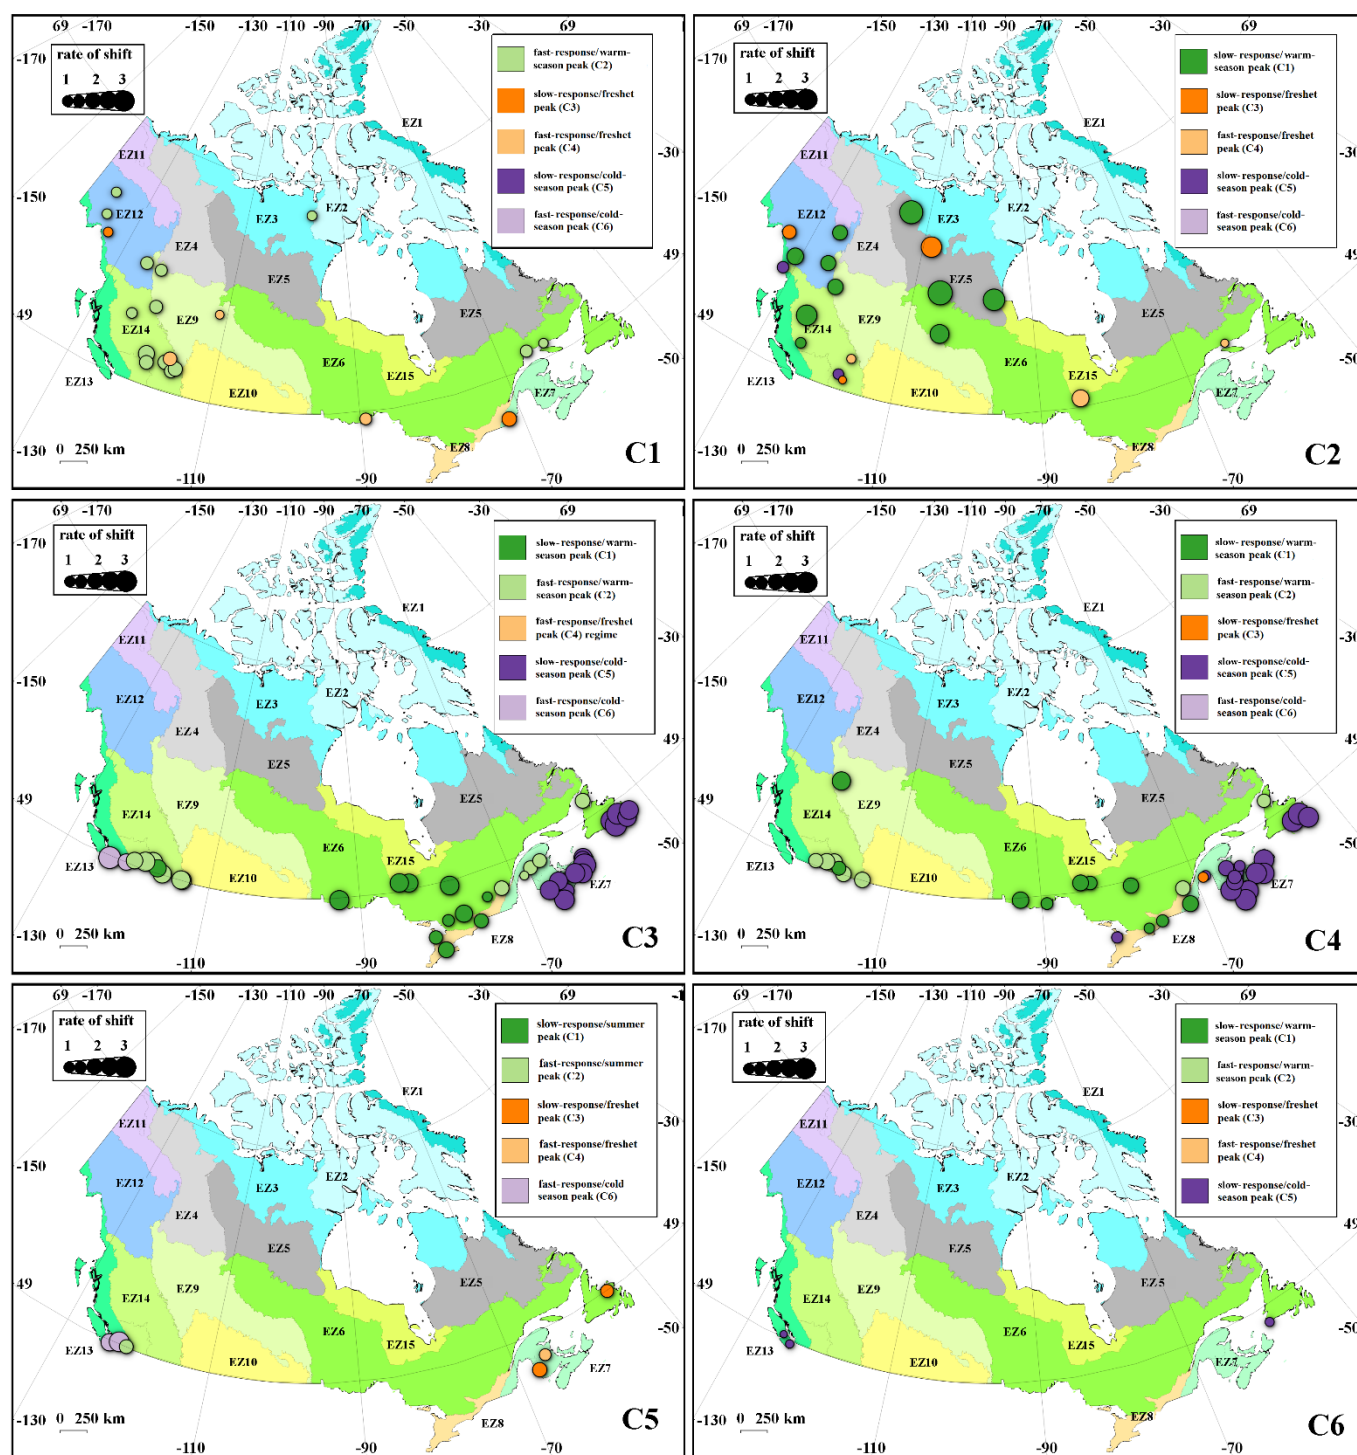

**Figure S6.** Mapping shifts in natural streamflow regime throughout Canada from 1966 to 2010. In each panel, circles identify the streams in which the regime is shifted. Colors show the initial regime type from which the streamflow is departed toward the reference cluster, which is given in each panel. Rates of the shifts between regime types in each stream are proportional to the size of each circle.

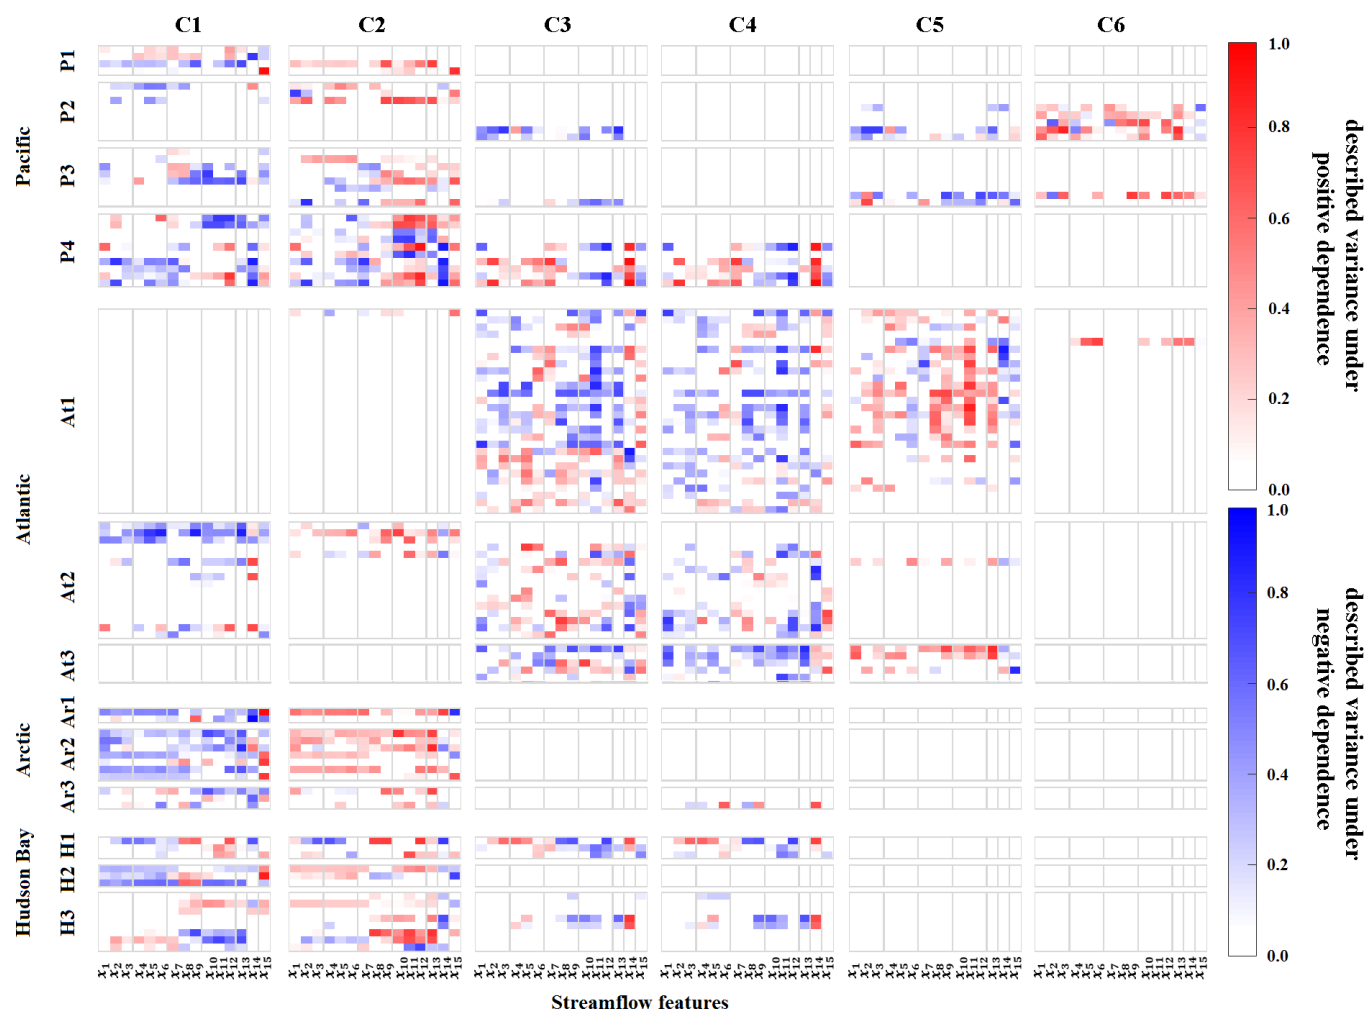

**Figure S7.** The alterations in regime types for 105 RHBN streams attributed to the first moments of the 15 IHA considered. Shades of red and blue show the positive and negative dependencies between changes in streamflow features and the degrees of membership, respectively. Color saturation shows the coefficient of determination between changes in the streamflow features and the degrees of membership representing the percentage of described variance in changes of streamflow regime by changes in streamflow features.

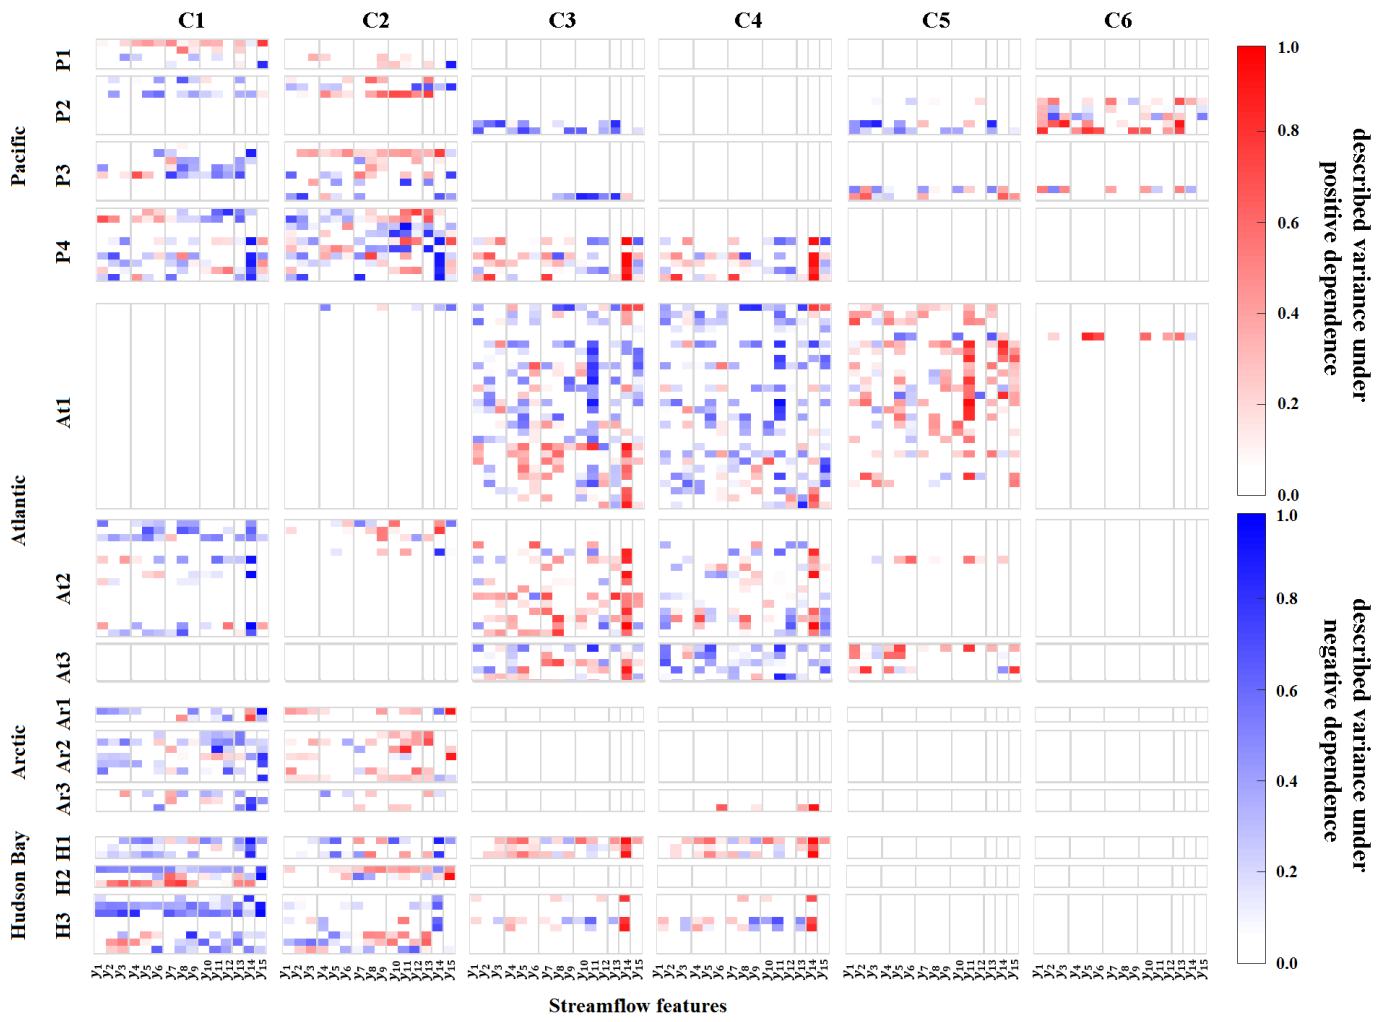

**Figure S8.** The alterations in regime types for 105 RHBN streams attributed to the second moments of the 15 IHA considered. Shades of red and blue show the positive and negative dependencies between changes in streamflow features and the degrees of membership, respectively. Color saturation shows the coefficient of determination between changes in the streamflow features and the degrees of membership representing the percentage of described variance in changes of streamflow regime by changes in streamflow features.

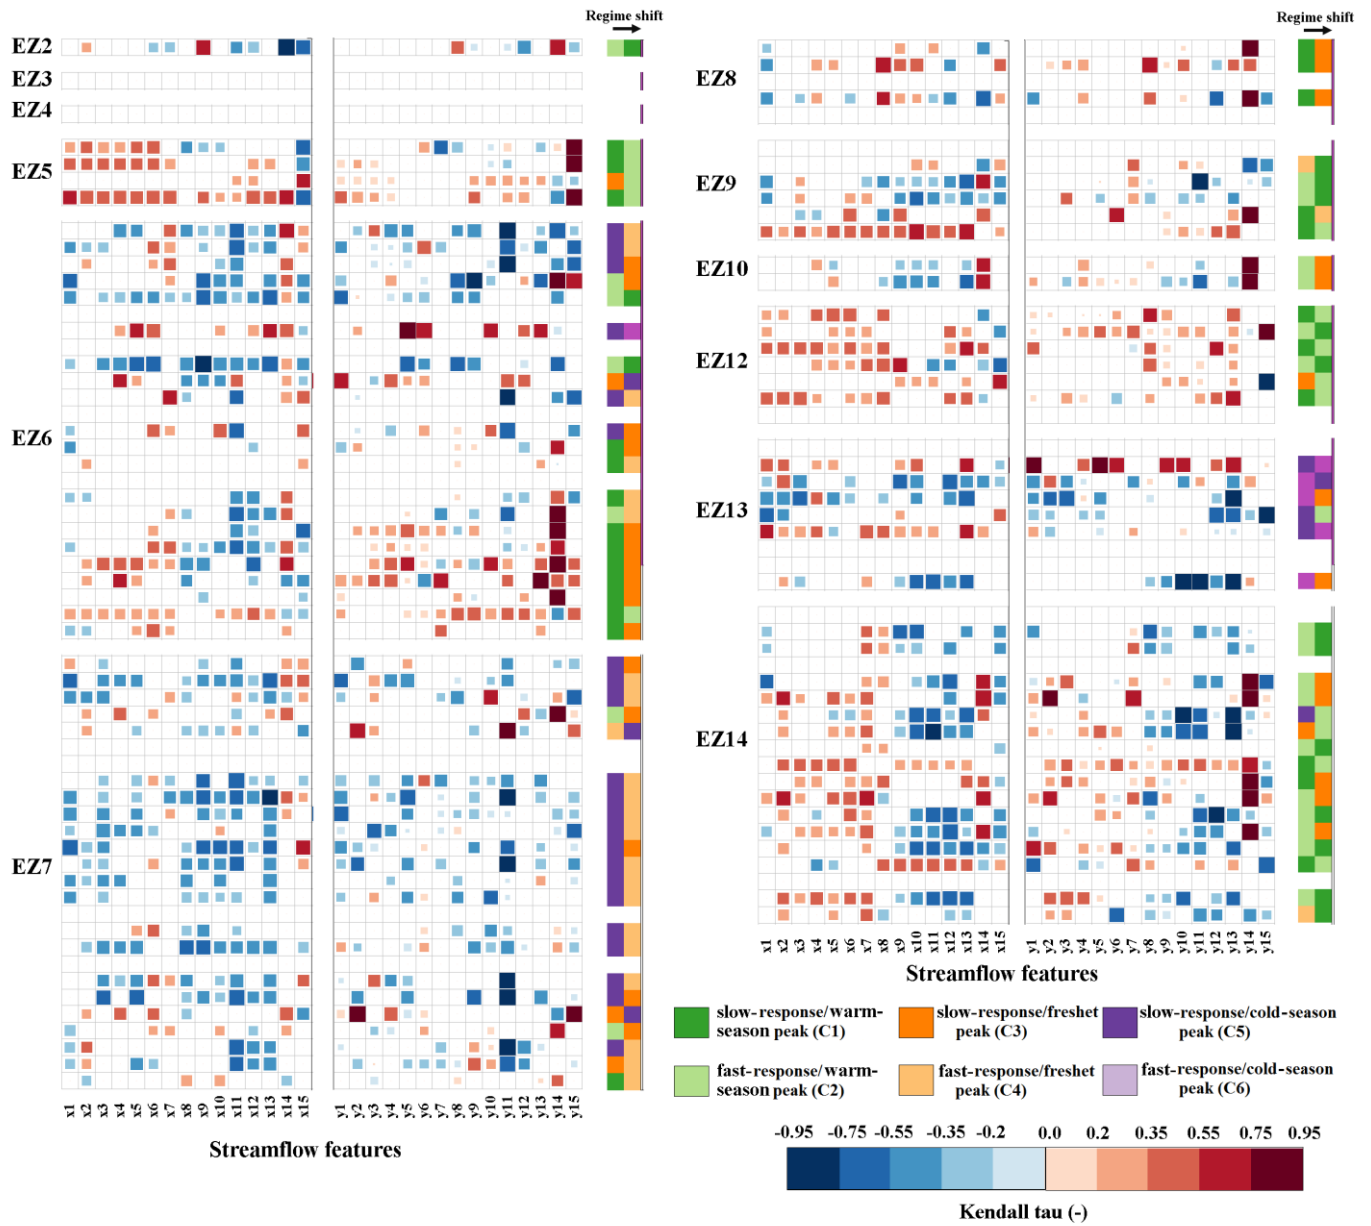

**Figure S9.** Dominant regime shifts across 105 RHBN streams in Canada attributed to the first and second moments of the 15 IHAs considered. Shades of red and blue show the values of squared of Kendall's tau between changes in streamflow features and degrees of membership. The dominant regime shift at each stream is identified by the color scheme described in the legend. Streams are grouped in ecozones and ordered from low (top) to the high (bottom) elevations.

**Table S6.** Summary information for the nine unseen stations in the Prairies ecozone.

| <b>Station</b> | <b>Station ID</b> | <b>Station Name</b>                      | <b>Province</b> | <b>Lat.</b> | <b>Long.</b> | <b>Basin area (km<sup>2</sup>)</b> | <b>Sub-basin</b> | <b>Basin</b> |
|----------------|-------------------|------------------------------------------|-----------------|-------------|--------------|------------------------------------|------------------|--------------|
| 05OB021        | P1                | Mowbray Creek Near Mowbray               | MB              | 49.0        | -98.4        | 263                                | Nelson           | Hudson Bay   |
| 05OB016        | P2                | Snowflake Creek Near Snowflake           | MB              | 49.0        | -98.6        | 975                                | Nelson           | Hudson Bay   |
| 05LL014        | P3                | Pine Creek Near Melbourne                | MB              | 49.9        | -99.2        | 225                                | Nelson           | Hudson Bay   |
| 05MF001        | P4                | Little Saskatchewan River Near Minnedosa | MB              | 50.4        | -99.9        | 2610                               | Nelson           | Hudson Bay   |
| 05MD005        | P5                | Shell River Near Inglis                  | MB              | 51.0        | -101.3       | 1970                               | Nelson           | Hudson Bay   |
| 05HD036        | P6                | Swift Current Creek Below Rock Creek     | SK              | 49.8        | -108.5       | 1430                               | Nelson           | Hudson Bay   |
| 05EA005        | P7                | Sturgeon River Near Villeneuve           | AB              | 53.6        | -113.7       | 1890                               | Nelson           | Hudson Bay   |
| 05CB001        | P8                | Little Red Deer River Near The Mouth     | AB              | 52.         | -114.1       | 2580                               | Nelson           | Hudson Bay   |
| 05BL014        | P9                | Sheep River At Black Diamond             | AB              | 50.7        | -114.2       | 592                                | Nelson           | Hudson Bay   |
